# Supplementary material for: Novel glycidyl azide polymers containing aromatic diol units: synthesis and characterization for their application as energetic composite propellant binders
Source: Royal Society of Chemistry journal article supplement (doi:10.1039/d6ra00798h), 2026-04-10
Supplement: d6ra00798h1.pdf [file d6ra00798h1.pdf]

## Novel glycidyl azide polymers containing aromatic diol units: Synthesis and characterization for energetic composite propellant binders

Giang Le-Nhat-Thuy,<sup>\*,a,b</sup> Dang Thi Tuyet Anh,<sup>a,b</sup> Vu Quang Hung,<sup>c</sup> Hoang Thi Phuong,<sup>a,b</sup> Nguyen Ha Thanh,<sup>a,b</sup> Nguyen Thi Quynh Giang,<sup>a,b</sup> Nguyen Tuan Anh,<sup>a,b</sup> Dang Thi Mai,<sup>a</sup> Nguyen Van Tuyen<sup>\*,a,b</sup>

<sup>a</sup>*Institute of Chemistry, Vietnam Academy of Science and Technology (VAST), 18 Hoang Quoc Viet, Cau Giay, Hanoi, Vietnam*

<sup>b</sup>*Graduate University of Science and Technology, VAST, 18 Hoang Quoc Viet, Cau Giay, Hanoi, Vietnam*

<sup>c</sup>*Institute of Materials, Biology and Environment, Academy of Military Science and Technology (AMST), 17 Hoang Sam, Nghia Do, Hanoi, Vietnam*

†\* Corresponding Authors:

Dr. Giang Le-Nhat-Thuy (Email: [lehatthuygiang@yahoo.com](mailto:lehatthuygiang@yahoo.com)); Prof. Tuyen Van Nguyen (E-mail: [ngvtuyen@hotmail.com](mailto:ngvtuyen@hotmail.com), [ngvtuyen@ich.vast.vn](mailto:ngvtuyen@ich.vast.vn))

## SUPPLEMENTARY INFORMATION

## 1. Charaterization of synthesized polymers PECH

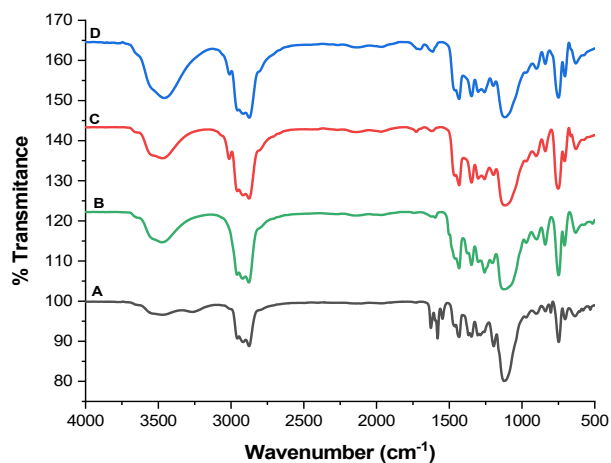

Figure S1. IR spectra of PECH-NR (A), PECH-CA (B), PECH-2BM (C), PECH-3BM (D)

Table S1. Yields, molecular weights and PDI of polymers PECH

| Entry | Sample   | Yield (%) | $M_n$ (g/mol)* | $M_w$ (g/mol)* | PDI* |
|-------|----------|-----------|----------------|----------------|------|
| 1     | PECH-NR  | 94        | 1714           | 2426           | 1.42 |
| 2     | PECH-CA  | 92        | 1005           | 1566           | 1.56 |
| 3     | PECH-2BM | 90        | 1240           | 1989           | 1.60 |
| 4     | PECH-3BM | 85        | 1800           | 2522           | 1.40 |

\*determined by GPC

## 2. Characterization of of synthesized polymers GAP

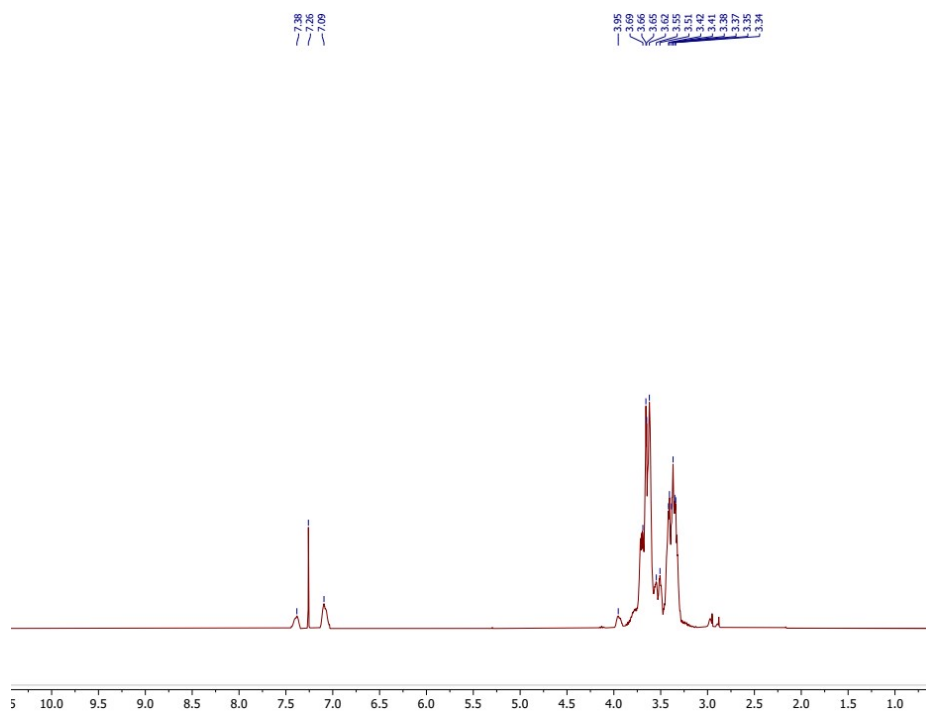

Figure S2.  $^1\text{H}$  NMR spectra of polymer GAP-NR

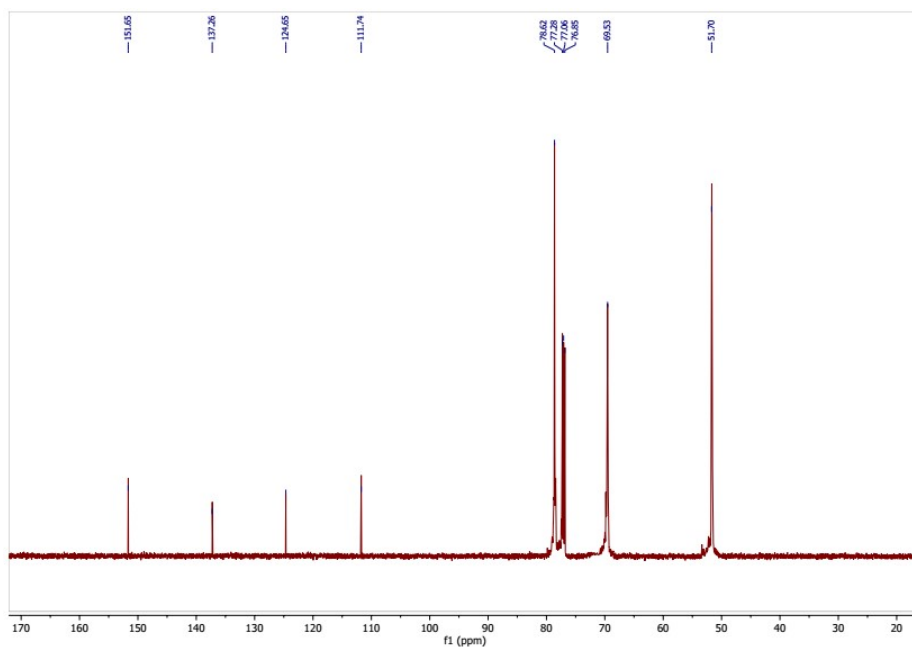

Figure S3.  $^{13}\text{C}$  NMR spectra of polymer GAP-NR

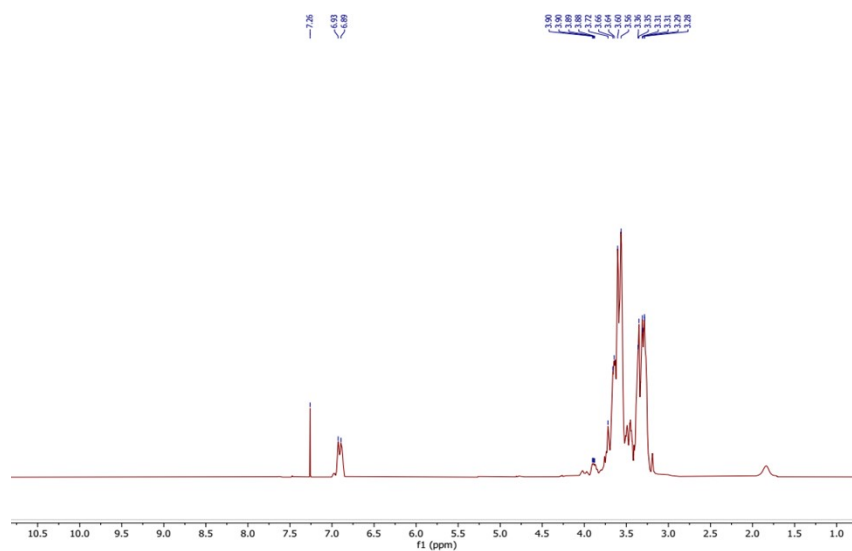

Figure S4.  $^1\text{H}$  NMR spectra of polymer GAP-CA

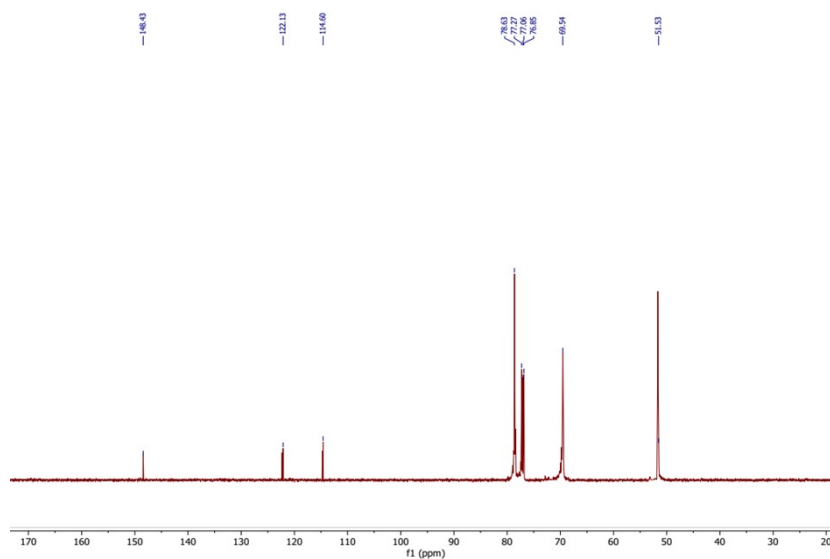

Figure S5.  $^{13}\text{C}$  NMR spectra of polymer GAP-CA

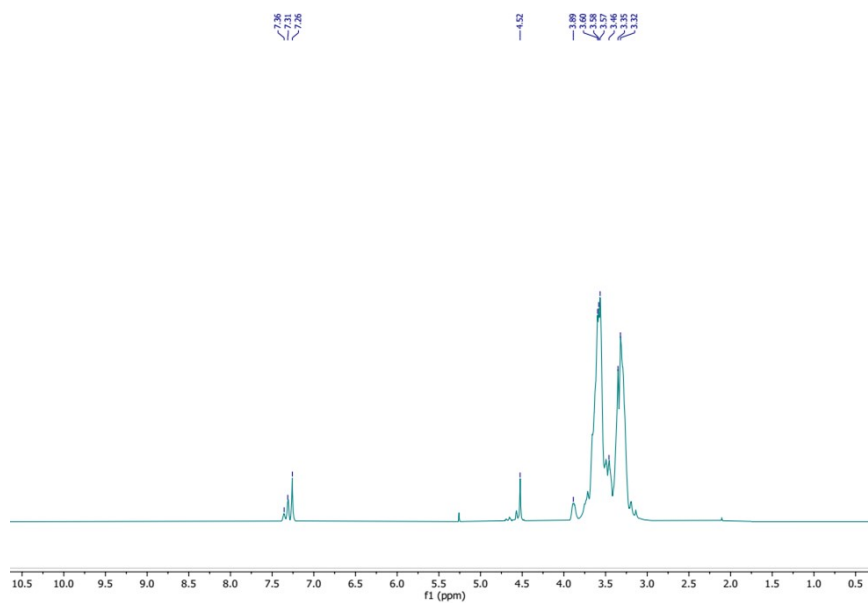

**Figure S6.**  $^1\text{H}$  NMR spectra of polymer GAP-2BM

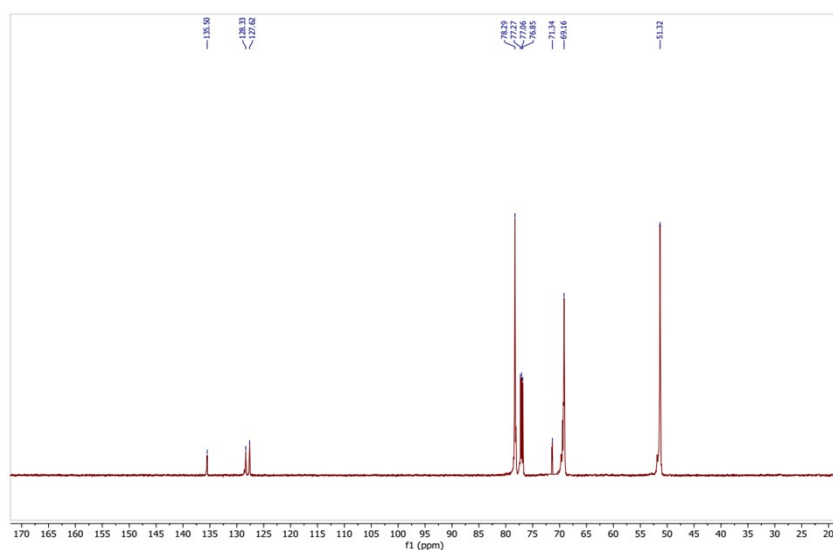

**Figure S7.**  $^{13}\text{C}$  NMR spectra of polymer GAP-2BM

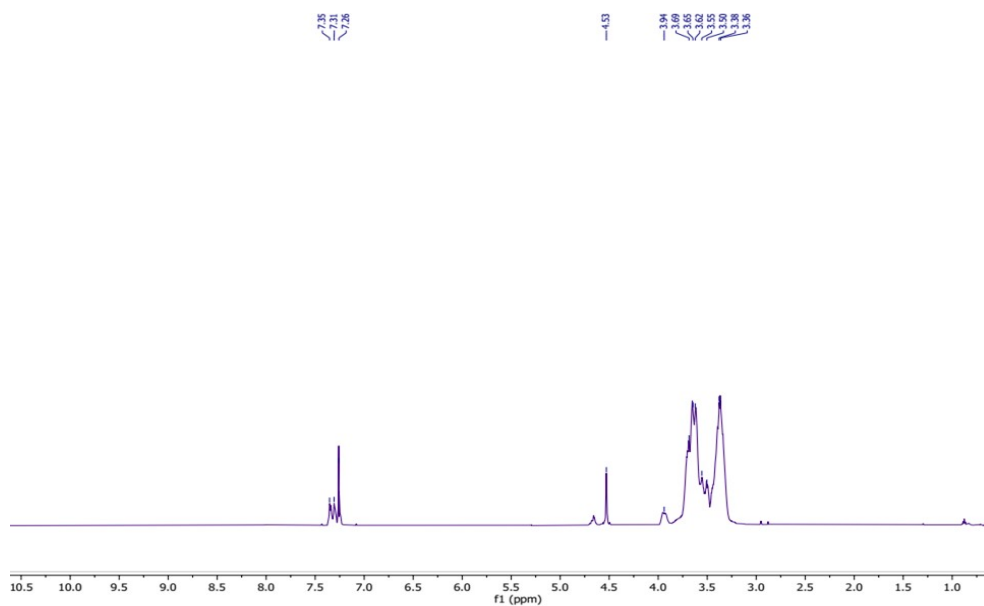

**Figure S8.**  $^1\text{H}$  NMR spectra of polymer GAP-3BM

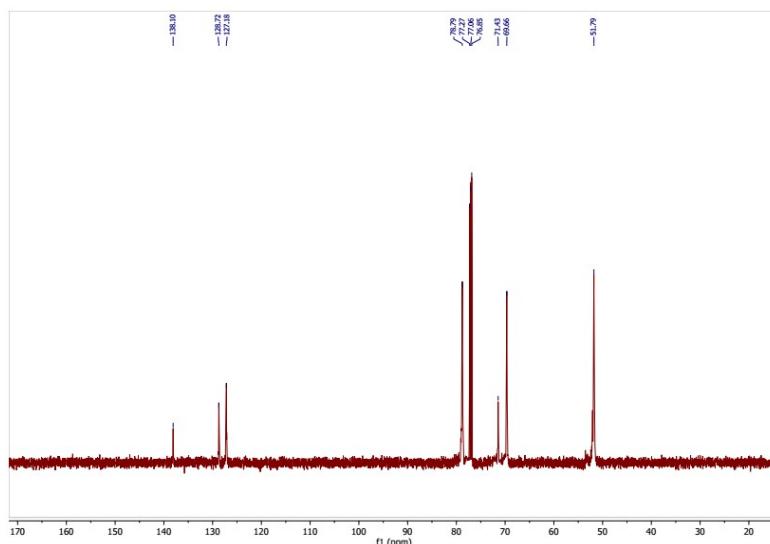

Figure S9.  $^{13}\text{C}$  NMR spectra of polymer GAP-3BM

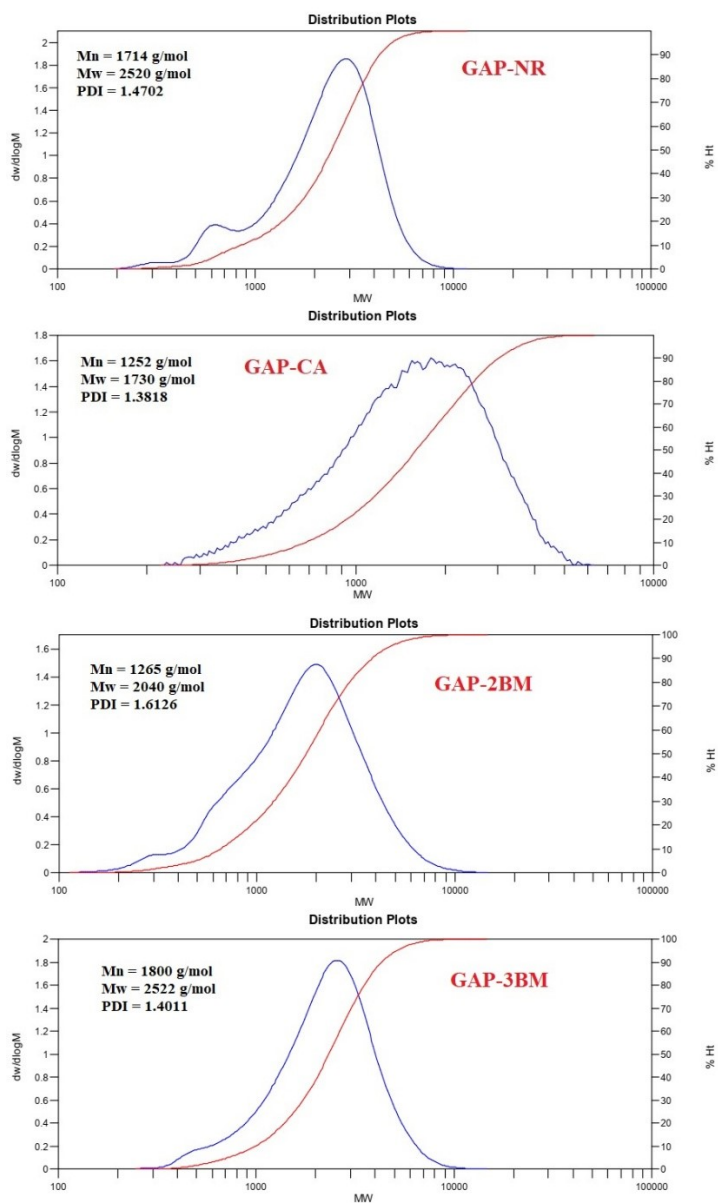

Figure S10. GPC curves of GAPs in chloroform eluent and using polystyrene standard

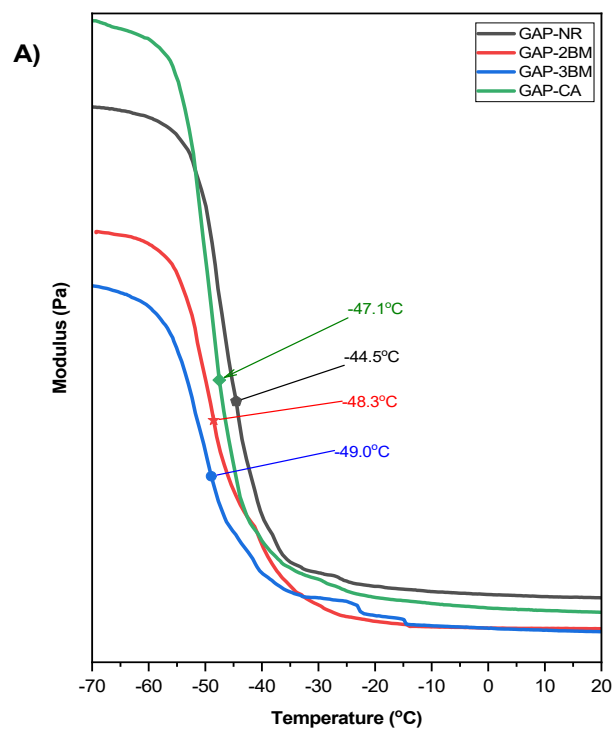

Fig. S11 DMA curves of polymers GAP containing aromatic diol units

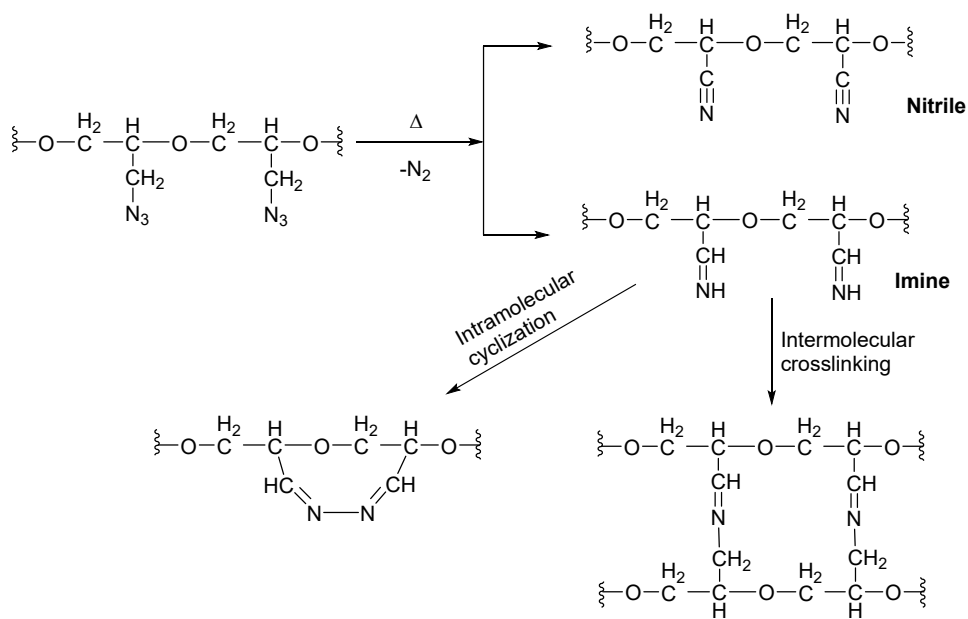

Scheme S1. Proposed decomposition mechanism in TGA of synthesized glycidyl azide polymers
